# Supplementary material for: Identification and quantification of honeybee venom constituents by multiplatform metabolomics
Source: PubMed Central journal article supplement (PMC7729905; doi:10.1038/s41598-020-78740-1), 2020-12-10
Supplement: 41598_2020_78740_MOESM1_ESM.pdf [file 41598_2020_78740_MOESM1_ESM.pdf]

## Supplementary information

### Identification and quantification of honeybee venom constituents by multiplatform metabolomics

Agnieszka Klupczynska <sup>1,\*</sup>, Szymon Plewa <sup>1</sup>, Paweł Dereziński <sup>1</sup>, Timothy J. Garrett <sup>2</sup>,  
Vanessa Y. Rubio <sup>2</sup>, Zenon J. Kokot <sup>3</sup> and Jan Matysiak <sup>1</sup>

<sup>1</sup> Department of Inorganic and Analytical Chemistry, Poznan University of Medical Sciences, 60 - 780 Poznan, Poland

<sup>2</sup> Department of Pathology, Immunology and Laboratory Medicine, College of Medicine, University of Florida, Gainesville, FL 32610, USA

<sup>3</sup> Faculty of Health Sciences, Calisia University – Kalisz, Poland, 62-800 Kalisz, Poland

\* Correspondence: [aklupczynska@ump.edu.pl](mailto:aklupczynska@ump.edu.pl)

#### Contents

**Supplementary Table S1.** Metabolites identified in honeybee venom extracts using LC-MS-based untargeted methodology (arranged alphabetically).

**Supplementary Table S2.** A list of metabolites determined using AbsoluteIDQ p180 kit in different honeybee venom extracts (methanolic; 0.1% formic acid in water; DMSO).

**Supplementary Table S3.** A list of MRM transitions for 42 amino acids and their corresponding internal standards along with collision energy values.

**Supplementary Table S4.** The percentage content of the amino acids quantified in the studied HBV samples collected in different years (percentage of the dry weight of HBV).

**Supplementary Table S5.** LC parameters for untargeted metabolomics.

**Supplementary Table S6.** MS parameters for untargeted metabolomics.

**Supplementary Table S7.** LC parameters for wide-spectrum metabolite determination using AbsoluteIDQ p180 kit.

**Supplementary Table S8.** MS parameters for wide-spectrum metabolite determination using AbsoluteIDQ p180 kit.

**Supplementary Table S9.** LC parameters for wide-spectrum amino acid determination using aTRAQ kit.

**Supplementary Table S10.** MS parameters for wide-spectrum amino acid determination using aTRAQ kit.

**Supplementary Figure S1.** Venn diagram presenting common and unique analytes covered by the two applied targeted metabolomics methodologies (AbsoluteIDQ p180 kit and aTRAQ kit) among non-proteinogenic amino acids and amino acids derivatives. Both kits enable analysis of the same set of proteinogenic amino acids.

**Supplementary Figure S2.** A workflow applied to select the most appropriate solvent for determination of free amino acids in honeybee venom samples.

**Supplementary Figure S3.** Bar chart showing the impact of solvent on the total amino acid concentration (average  $\pm$  SD) quantified in honeybee venom sample.

**Supplementary Figure S4.** Scores plots between the first and second principal components (with explained variances shown in brackets) obtained in principal component analysis (PCA) of amino acid profiles in honeybee venom.

**Supplementary Figure S5.** Amino acid profiles determined in solutions of honeybee venom (c=50 mg/ml) collected in different months and years (A – 2015, B- 2018).

**Supplementary Table S1.** Metabolites identified in honeybee venom extracts using LC-MS-based untargeted methodology (arranged alphabetically).

| Compound name                      | Metabolite class                        | Molecular formula | Molecular weight, Da | RT, min | Polarity |
|------------------------------------|-----------------------------------------|-------------------|----------------------|---------|----------|
| (+)-salsolinol                     | tetrahydroisoquinolines                 | C10H13NO2         | 179.2157             | 4.87    | pos      |
| 1-aminocyclopropanecarboxylic acid | amino acids, peptides, and analogues    | C4H7NO2           | 101.1039             | 0.81    | pos      |
| 3-(2-hydroxyphenyl)propanoic acid  | phenylpropanoic acids                   | C9H10O3           | 166.1739             | 8.61    | neg      |
| 3,4 dihydroxyphenylacetic acid     | phenols                                 | C8H8O4            | 168.1467             | 6.85    | neg      |
| 3-aminoisobutanoic acid            | amino acids, peptides, and analogues    | C4H9NO2           | 103.1198             | 0.94    | pos      |
| 3-methyl-2-oxovaleric acid         | organic acids and derivatives           | C6H10O3           | 130.1418             | 6.73    | neg      |
| 3-O-methyl dopa                    | amino acids, peptides, and analogues    | C10H13NO4         | 211.2145             | 6.04    | neg      |
| 4-guanidinobutanoic acid           | amino acids, peptides, and analogues    | C5H11N3O2         | 145.1597             | 1.66    | pos      |
| 5-methylcytosine                   | pyrimidines and pyrimidine derivatives  | C5H7N3O           | 125.1286             | 1.21    | pos      |
| acetylglycine                      | amino acids, peptides, and analogues    | C4H7NO3           | 117.1033             | 1.31    | neg      |
| adenine                            | purines and purine derivatives          | C5H5N5            | 135.1267             | 1.61    | pos, neg |
| adenosine 5'-monophosphate         | nucleosides, nucleotides, and analogues | C10H14N5O7P       | 347.2212             | 1.77    | pos, neg |
| alanine / sarcosine                | amino acids, peptides, and analogues    | C3H7NO2           | 89.0932              | 0.75    | pos      |
| allantoin                          | imidazoles                              | C4H6N4O3          | 158.1154             | 0.85    | neg      |
| arginine                           | amino acids, peptides, and analogues    | C6H14N4O2         | 174.2010             | 0.74    | pos      |
| aspartic acid                      | amino acids, peptides, and analogues    | C4H7NO4           | 133.1027             | 0.74    | pos      |
| betaine                            | amino acids, peptides, and analogues    | C5H11NO2          | 117.1463             | 0.86    | pos      |
| carnitine                          | quaternary ammonium salts               | C7H15NO3          | 161.1989             | 1.01    | pos      |
| citramalic acid                    | fatty acids and conjugates              | C5H8O5            | 148.1140             | 2.38    | neg      |

|                                     |                                           |            |          |      |          |
|-------------------------------------|-------------------------------------------|------------|----------|------|----------|
| citric acid                         | organic acids and derivatives             | C6H8O7     | 192.1235 | 2.05 | pos, neg |
| cytidine                            | nucleosides, nucleotides, and analogues   | C9H13N3O5  | 243.2166 | 1.69 | pos, neg |
| cytosine                            | pyrimidines and pyrimidine derivatives    | C4H5N3O    | 111.1020 | 0.89 | pos      |
| dihydrouracil                       | pyrimidines and pyrimidine derivatives    | C4H6N2O2   | 114.1026 | 1.43 | pos      |
| dopamine                            | catecholamines and derivatives            | C8H11NO2   | 153.1784 | 2.86 | pos, neg |
| fumaric acid                        | organic acids and derivatives             | C4H4O4     | 116.0722 | 2.08 | neg      |
| gamma-aminobutyric acid             | amino acids, peptides, and analogues      | C4H9NO2    | 103.1198 | 0.83 | pos      |
| gluconic acid                       | carbohydrates and carbohydrate conjugates | C6H12O7    | 196.1553 | 0.78 | pos, neg |
| glucosamine                         | carbohydrates and carbohydrate conjugates | C6H13NO5   | 179.1711 | 0.71 | pos      |
| glucose / fructose                  | carbohydrates and carbohydrate conjugates | C6H12O6    | 180.1559 | 0.80 | neg      |
| glucuronic acid / galacturonic acid | carbohydrates and carbohydrate conjugates | C6H10O7    | 194.1394 | 0.78 | neg      |
| glutamic acid                       | amino acids, peptides, and analogues      | C5H9NO4    | 147.1293 | 0.76 | neg      |
| glutamine                           | amino acids, peptides, and analogues      | C5H10N2O3  | 146.1445 | 0.76 | pos, neg |
| glyceraldehyde                      | carbohydrates and carbohydrate conjugates | C3H6O3     | 90.0779  | 0.80 | neg      |
| glyceric acid                       | carbohydrates and carbohydrate conjugates | C3H6O4     | 106.0773 | 0.91 | neg      |
| glycine                             | amino acids, peptides, and analogues      | C2H5NO2    | 75.0666  | 0.74 | pos      |
| glycolic acid                       | organic acids and derivatives             | C2H4O3     | 76.0514  | 0.93 | neg      |
| guanosine                           | nucleosides, nucleotides, and analogues   | C10H13N5O5 | 283.2407 | 6.40 | neg      |

|                        |                                      |           |           |      |          |
|------------------------|--------------------------------------|-----------|-----------|------|----------|
| hippuric acid          | benzene and substituted derivatives  | C9H9NO3   | 179.1727  | 7.93 | pos, neg |
| histamine              | amines                               | C5H9N3    | 111.1451  | 0.66 | pos      |
| homovanillic acid      | phenols                              | C9H10O4   | 182.1733  | 7.65 | neg      |
| hypoxanthine           | purines and purine derivatives       | C5H4N4O   | 136.1115  | 2.15 | pos, neg |
| imidazoleacetic acid   | imidazoles                           | C5H6N2O2  | 126.1133  | 1.01 | pos      |
| isocitric acid         | organic acids and derivatives        | C6H8O7    | 192.1235  | 1.21 | pos, neg |
| isoleucine             | amino acids, peptides, and analogues | C6H13NO2  | 131.1729  | 2.40 | pos      |
| kynurenic acid         | quinolines and derivatives           | C10H7NO3  | 189.1675  | 7.66 | pos      |
| lactic acid            | organic acids and derivatives        | C3H6O3    | 90.0779   | 0.84 | pos      |
| L-Dopa (levodopa)      | amino acids, peptides, and analogues | C9H11NO4  | 197.1879  | 2.36 | pos      |
| leucine                | amino acids, peptides, and analogues | C6H13NO2  | 131.1729  | 2.63 | pos      |
| malic acid             | organic acids and derivatives        | C4H6O5    | 134.0874  | 1.14 | neg      |
| malonic acid           | organic acids and derivatives        | C3H4O4    | 104.0615  | 1.30 | neg      |
| methionine             | amino acids, peptides, and analogues | C5H11NO2S | 149.2110  | 1.51 | pos      |
| N-acetylaspartic acid  | amino acids, peptides, and analogues | C6H9NO5   | 175.1394  | 1.58 | pos, neg |
| N-acetylglutamic acid  | amino acids, peptides, and analogues | C7H11NO5  | 189.1659  | 2.32 | pos, neg |
| N-acetylputrescine     | organic acids and derivatives        | C6H14N2O  | 130.1882  | 1.18 | pos      |
| N-alpha-acetylarginine | amino acids, peptides, and analogues | C8H16N4O3 | 216.2376  | 1.60 | pos      |
| N-alpha-acetyllysine   | amino acids, peptides, and analogues | C8H16N2O3 | 188.22424 | 1.11 | pos      |
| nicotinic acid         | pyridines and derivatives            | C6H5NO2   | 123.1094  | 1.52 | neg      |
| N-methyl aspartic acid | amino acids, peptides, and analogues | C5H9NO4   | 147.1293  | 0.80 | pos      |
| norepinephrine         | catecholamines and derivatives       | C8H11NO3  | 169.1778  | 1.03 | pos, neg |

|                      |                                           |            |          |       |          |
|----------------------|-------------------------------------------|------------|----------|-------|----------|
| ornithine            | amino acids, peptides, and analogues      | C5H12N2O2  | 132.1610 | 0.66  | pos      |
| pantothenic acid     | alcohols and polyols                      | C9H17NO5   | 219.2350 | 6.60  | pos      |
| phenylalanine        | amino acids, peptides, and analogues      | C9H11NO2   | 165.1891 | 6.20  | pos      |
| phenylethylamine     | amines                                    | C8H11N     | 121.1796 | 6.71  | pos      |
| pipecolic acid       | amino acids, peptides, and analogues      | C6H11NO2   | 129.1570 | 1.30  | pos      |
| proline              | amino acids, peptides, and analogues      | C5H9NO2    | 115.1305 | 0.91  | pos, neg |
| pyridoxal            | pyridines and derivatives                 | C8H9NO3    | 167.1620 | 1.98  | pos      |
| pyroglutamic acid    | amino acids, peptides, and analogues      | C5H7NO3    | 129.1140 | 1.94  | pos, neg |
| quinic acid          | alcohols and polyols                      | C7H12O6    | 192.1666 | 0.90  | neg      |
| serine               | amino acids, peptides, and analogues      | C3H7NO3    | 105.0926 | 0.72  | pos      |
| serotonin            | tryptamines and derivatives               | C10H12N2O  | 176.2151 | 6.31  | pos      |
| succinic acid        | organic acids and derivatives             | C4H6O4     | 118.0880 | 2.39  | pos, neg |
| tartaric acid        | carbohydrates and carbohydrate conjugates | C4H6O6     | 150.0868 | 0.92  | neg      |
| taurine              | amino acids, peptides, and analogues      | C2H7NO3S   | 125.1470 | 0.75  | pos      |
| thymine              | pyrimidines and pyrimidine derivatives    | C5H6N2O2   | 126.1133 | 3.395 | pos      |
| tryptophan           | amino acids, peptides, and analogues      | C11H12N2O2 | 204.2252 | 7.60  | pos, neg |
| tryptophanamide      | tryptamines and derivatives               | C11H13N3O  | 203.2404 | 6.81  | pos      |
| tyramine             | amines                                    | C8H11NO    | 137.1790 | 4.45  | pos      |
| tyrosine             | amino acids, peptides, and analogues      | C9H11NO3   | 181.1885 | 3.43  | pos, neg |
| uracil               | pyrimidines and pyrimidine derivatives    | C4H4N2O2   | 112.0868 | 1.49  | pos, neg |
| ureidopropionic acid | amino acids, peptides, and analogues      | C4H8N2O3   | 132.1179 | 1.30  | pos      |
| uric acid            | purines and purine derivatives            | C5H4N4O3   | 168.1103 | 1.92  | pos, neg |

|                          |                                           |                                                                |          |      |          |
|--------------------------|-------------------------------------------|----------------------------------------------------------------|----------|------|----------|
| uridine                  | nucleosides, nucleotides, and analogues   | C <sub>9</sub> H <sub>12</sub> N <sub>2</sub> O <sub>6</sub>   | 244.2014 | 2.90 | pos, neg |
| uridine 5'-monophosphate | nucleosides, nucleotides, and analogues   | C <sub>9</sub> H <sub>13</sub> N <sub>2</sub> O <sub>9</sub> P | 324.1813 | 1.37 | pos, neg |
| valine                   | amino acids, peptides, and analogues      | C <sub>5</sub> H <sub>11</sub> NO <sub>2</sub>                 | 117.1463 | 1.18 | pos, neg |
| vanilloside              | carbohydrates and carbohydrate conjugates | C <sub>14</sub> H <sub>20</sub> O <sub>8</sub>                 | 316.3060 | 7.89 | neg      |
| xanthine                 | purines and purine derivatives            | C <sub>5</sub> H <sub>4</sub> N <sub>4</sub> O <sub>2</sub>    | 152.1109 | 2.60 | neg      |

**Supplementary Table S2.** A list of metabolites determined using AbsoluteIDQ p180 kit in different honeybee venom extracts (methanolic; 0.1% formic acid in water; DMSO).

“<LOD” means a value below limit of detection; “<LLOQ” represents a value below lower limit of quantitation; “>ULOQ” means a value above upper limit of quantitation.

| Class                          | Metabolite                                       | % dry weight of honeybee venom |                  |          |
|--------------------------------|--------------------------------------------------|--------------------------------|------------------|----------|
|                                |                                                  | methanol                       | 0.1% formic acid | DMSO     |
| acylcarnitines                 | carnitine                                        | 2.73E-04                       | 2.77E-04         | 4.27E-04 |
|                                | acetylcarnitine                                  | <LLOQ                          | <LLOQ            | <LLOQ    |
|                                | propionylcarnitine                               | <LOD                           | <LOD             | <LOD     |
|                                | hydroxybutyrylcarnitine                          | <LOD                           | <LOD             | <LOD     |
|                                | hydroxypropionylcarnitine                        | <LOD                           | <LOD             | <LOD     |
|                                | propenoylcarnitine                               | 1.23E-06                       | <LOD             | <LOD     |
|                                | butyrylcarnitine                                 | <LOD                           | <LOD             | <LOD     |
|                                | butenylcarnitine                                 | 2.22E-06                       | <LOD             | <LOD     |
|                                | valerylcarnitine                                 | <LOD                           | <LOD             | <LOD     |
|                                | glutaryl carnitine(hydroxyhexanoylcarnitine)     | <LOD                           | <LOD             | <LOD     |
|                                | methylglutaryl carnitine                         | <LOD                           | <LOD             | <LOD     |
|                                | hydroxyvalerylcarnitine (methylmalonylcarnitine) | <LOD                           | <LOD             | <LOD     |
|                                | tiglylcarnitine                                  | <LOD                           | <LOD             | <LOD     |
|                                | glutaconylcarnitine                              | <LOD                           | <LOD             | 6.74E-06 |
|                                | hexanoylcarnitine (fumaryl carnitine)            | <LOD                           | <LOD             | <LOD     |
|                                | hexenoylcarnitine                                | 9.06E-06                       | 4.75E-06         | 2.59E-05 |
|                                | pimelylcarnitine                                 | <LOD                           | <LOD             | <LOD     |
|                                | octanoylcarnitine                                | <LOD                           | <LOD             | <LOD     |
|                                | nonaylcarnitine                                  | <LOD                           | <LOD             | <LOD     |
|                                | decanoylcarnitine                                | <LLOQ                          | <LLOQ            | <LLOQ    |
|                                | decenoylcarnitine                                | <LOD                           | <LOD             | <LOD     |
|                                | decadienylcarnitine                              | <LOD                           | <LOD             | <LOD     |
|                                | dodecanoylcarnitine                              | <LLOQ                          | <LLOQ            | <LLOQ    |
|                                | dodecanedioylcarnitine                           | 5.23E-05                       | <LOD             | <LOD     |
|                                | dodecenoylcarnitine                              | 1.34E-05                       | 7.77E-06         | 1.56E-05 |
|                                | tetradecanoylcarnitine                           | <LLOQ                          | <LLOQ            | <LLOQ    |
|                                | tetradecenoylcarnitine                           | 2.51E-06                       | 1.11E-06         | 2.27E-06 |
|                                | hydroxytetradecenoylcarnitine                    | 1.85E-06                       | <LOD             | 3.16E-06 |
|                                | tetradecadienylcarnitine                         | 1.32E-06                       | <LOD             | <LOD     |
|                                | hydroxytetradecadienylcarnitine                  | 1.90E-06                       | <LOD             | <LOD     |
|                                | hexadecanoylcarnitine                            | <LLOQ                          | <LLOQ            | <LLOQ    |
|                                | hydroxyhexadecanoylcarnitine                     | 4.03E-05                       | 1.15E-05         | 2.55E-05 |
|                                | hexadecenoylcarnitine                            | <LOD                           | <LOD             | <LOD     |
| hydroxyhexadecenoylcarnitine   | 3.53E-06                                         | 2.06E-06                       | 3.34E-06         |          |
| hexadecadienylcarnitine        | 2.06E-06                                         | <LOD                           | 2.31E-06         |          |
| hydroxyhexadecadienylcarnitine | <LOD                                             | <LOD                           | <LOD             |          |
| octadecanoylcarnitine          | <LLOQ                                            | <LLOQ                          | <LLOQ            |          |

|                                 |                              |          |          |          |
|---------------------------------|------------------------------|----------|----------|----------|
|                                 | octadecenoylcarnitine        | <LOD     | <LOD     | <LOD     |
|                                 | hydroxyoctadecenoylcarnitine | 4.67E-06 | <LOD     | 4.33E-06 |
|                                 | octadecadienylcarnitine      | 2.55E-06 | 1.42E-06 | 2.81E-06 |
| amino acids and biogenic amines | alanine                      | 8.65E-03 | 1.44E-02 | 9.25E-03 |
|                                 | arginine                     | 1.44E-03 | >ULOQ    | >ULOQ    |
|                                 | asparagine                   | <LLOQ    | 2.76E-04 | 3.38E-04 |
|                                 | aspartate                    | 3.09E-04 | 4.24E-03 | 2.03E-03 |
|                                 | citrulline                   | <LLOQ    | <LLOQ    | <LLOQ    |
|                                 | glutamine                    | <LOD     | <LOD     | <LLOQ    |
|                                 | glutamate                    | 1.11E-03 | 2.75E-03 | 1.35E-03 |
|                                 | glycine                      | 1.39E-02 | 1.45E-02 | 1.08E-02 |
|                                 | histidine                    | 3.12E-04 | 1.36E-03 | 1.17E-03 |
|                                 | isoleucine                   | 8.17E-04 | 9.65E-04 | 7.94E-04 |
|                                 | leucine                      | <LLOQ    | <LLOQ    | <LLOQ    |
|                                 | lysine                       | 3.33E-03 | 5.28E-03 | 3.91E-03 |
|                                 | methionine                   | <LOD     | <LOD     | <LLOQ    |
|                                 | ornithine                    | <LLOQ    | <LLOQ    | 1.83E-04 |
|                                 | phenylalanine                | 3.91E-04 | 5.94E-04 | 5.47E-04 |
|                                 | proline                      | >ULOQ    | >ULOQ    | >ULOQ    |
|                                 | serine                       | 2.97E-04 | 7.18E-04 | 7.01E-04 |
|                                 | threonine                    | 2.45E-04 | 5.30E-04 | 4.13E-04 |
|                                 | tryptophan                   | <LLOQ    | 3.68E-04 | 3.46E-04 |
|                                 | tyrosine                     | 2.69E-04 | 4.71E-04 | 4.16E-04 |
|                                 | valine                       | 9.27E-04 | 1.01E-03 | 9.24E-04 |
|                                 | acetylornithine              | 4.01E-04 | 4.64E-04 | 1.27E-04 |
|                                 | asymmetric dimethylarginine  | 1.12E-04 | 1.97E-04 | 1.41E-04 |
|                                 | alpha-aminoadipic acid       | <LOD     | <LOD     | <LOD     |
|                                 | cis-4-hydroxyproline         | <LOD     | <LLOQ    | <LOD     |
|                                 | carnosine                    | <LOD     | <LLOQ    | <LLOQ    |
|                                 | creatinine                   | <LLOQ    | <LLOQ    | 2.42E-04 |
|                                 | L-Dopa                       | <LOD     | 2.13E-05 | <LOD     |
|                                 | dopamine                     | >ULOQ    | >ULOQ    | >ULOQ    |
|                                 | histamine                    | >ULOQ    | >ULOQ    | >ULOQ    |
|                                 | kynurenine                   | 4.00E-05 | 4.75E-05 | 6.85E-05 |
|                                 | methioninesulfoxide          | <LLOQ    | <LLOQ    | <LLOQ    |
|                                 | nitrotyrosine                | <LOD     | <LOD     | <LOD     |
| phenylethylamine                | 1.76E-05                     | 3.36E-05 | 1.71E-05 |          |
| putrescine                      | >ULOQ                        | >ULOQ    | >ULOQ    |          |
| symmetric dimethylarginine      | <LLOQ                        | <LOD     | <LLOQ    |          |
| serotonin                       | >ULOQ                        | >ULOQ    | >ULOQ    |          |
| spermidine                      | 2.84E-04                     | >ULOQ    | >ULOQ    |          |
| spermine                        | <LLOQ                        | 8.15E-05 | 1.59E-05 |          |
| trans-4-hydroxyproline          | <LLOQ                        | <LLOQ    | 3.59E-04 |          |
| taurine                         | 2.24E-03                     | >ULOQ    | >ULOQ    |          |
| total dimethylarginine          | 6.85E-05                     | 1.23E-04 | 8.84E-05 |          |



|                                   |                           |          |          |          |
|-----------------------------------|---------------------------|----------|----------|----------|
| hexoses                           | hexoses including glucose | 2.14E-01 | 4.37E-01 | 4.87E-01 |
| glycerophospholipids <sup>a</sup> | lysoPC a C14:0            | <LOD     | <LOD     | <LOD     |
|                                   | lysoPC a C16:0            | 6.81E-05 | 6.05E-05 | 1.45E-04 |
|                                   | lysoPC a C16:1            | <LOD     | <LOD     | 1.12E-05 |
|                                   | lysoPC a C17:0            | 9.73E-06 | 8.26E-06 | 1.61E-05 |
|                                   | lysoPC a C18:0            | 1.03E-04 | 6.19E-05 | 1.21E-04 |
|                                   | lysoPC a C18:1            | 1.26E-04 | 1.08E-04 | 1.51E-04 |
|                                   | lysoPC a C18:2            | 7.79E-05 | 5.57E-05 | 1.09E-04 |
|                                   | lysoPC a C20:3            | <LOD     | <LOD     | 2.57E-05 |
|                                   | lysoPC a C20:4            | 5.02E-06 | 4.84E-06 | 1.57E-05 |
|                                   | lysoPC a C24:0            | <LOD     | <LOD     | <LOD     |
|                                   | lysoPC a C26:0            | <LOD     | <LOD     | 9.53E-06 |
|                                   | lysoPC a C26:1            | <LOD     | <LOD     | 1.04E-05 |
|                                   | lysoPC a C28:0            | <LOD     | <LOD     | <LOD     |
|                                   | lysoPC a C28:1            | <LOD     | <LOD     | 9.27E-06 |
|                                   | PC aa C24:0               | <LOD     | <LOD     | <LOD     |
|                                   | PC aa C26:0               | <LOD     | <LOD     | <LOD     |
|                                   | PC aa C28:1               | <LOD     | <LOD     | <LOD     |
|                                   | PC aa C30:0               | 3.74E-05 | 3.06E-05 | 4.17E-05 |
|                                   | PC aa C30:2               | 1.92E-06 | 1.67E-06 | 4.33E-06 |
|                                   | PC aa C32:0               | 1.35E-05 | 4.13E-06 | 3.38E-05 |
|                                   | PC aa C32:1               | 1.83E-05 | 4.28E-06 | 3.88E-05 |
|                                   | PC aa C32:2               | 1.93E-06 | 1.56E-06 | 5.95E-06 |
|                                   | PC aa C32:3               | 2.16E-06 | 9.45E-07 | 5.23E-06 |
|                                   | PC aa C34:1               | 4.73E-05 | <LOD     | 4.41E-04 |
|                                   | PC aa C34:2               | <LOD     | <LOD     | 7.24E-04 |
|                                   | PC aa C34:3               | 2.44E-05 | <LOD     | 4.97E-05 |
|                                   | PC aa C34:4               | 4.21E-06 | 1.57E-06 | 1.14E-05 |
|                                   | PC aa C36:0               | <LOD     | <LOD     | <LOD     |
|                                   | PC aa C36:1               | 2.35E-05 | <LOD     | 1.28E-04 |
|                                   | PC aa C36:2               | 3.65E-05 | <LOD     | 5.21E-04 |
|                                   | PC aa C36:3               | 2.69E-05 | <LOD     | 2.27E-04 |
|                                   | PC aa C36:4               | 2.04E-05 | <LOD     | 3.50E-04 |
|                                   | PC aa C36:5               | 8.95E-06 | <LOD     | 3.83E-05 |
|                                   | PC aa C36:6               | 1.48E-05 | <LOD     | 1.93E-05 |
|                                   | PC aa C38:0               | <LOD     | <LOD     | 1.23E-05 |
|                                   | PC aa C38:1               | 2.03E-06 | <LOD     | 4.79E-06 |
|                                   | PC aa C38:3               | <LOD     | <LOD     | 1.05E-04 |
|                                   | PC aa C38:4               | <LOD     | <LOD     | 2.25E-04 |
|                                   | PC aa C38:5               | <LOD     | <LOD     | 8.36E-05 |
|                                   | PC aa C38:6               | 4.43E-06 | <LOD     | 1.66E-04 |
| PC aa C40:1                       | <LOD                      | <LOD     | <LOD     |          |
| PC aa C40:2                       | 3.51E-06                  | <LOD     | 1.06E-05 |          |
| PC aa C40:3                       | 2.99E-06                  | <LOD     | 5.57E-06 |          |
| PC aa C40:4                       | 1.85E-06                  | <LOD     | 7.44E-06 |          |

|             |          |          |          |
|-------------|----------|----------|----------|
| PC aa C40:5 | <LOD     | <LOD     | 1.96E-05 |
| PC aa C40:6 | <LOD     | <LOD     | 6.56E-05 |
| PC aa C42:0 | <LOD     | <LOD     | <LOD     |
| PC aa C42:1 | <LOD     | <LOD     | 8.98E-06 |
| PC aa C42:2 | 1.94E-05 | <LOD     | 2.91E-05 |
| PC aa C42:4 | 2.35E-06 | <LOD     | 3.89E-06 |
| PC aa C42:5 | <LOD     | <LOD     | <LOD     |
| PC aa C42:6 | <LOD     | <LOD     | <LOD     |
| PC ae C30:0 | <LOD     | <LOD     | <LOD     |
| PC ae C30:1 | 1.46E-06 | <LOD     | 3.12E-06 |
| PC ae C30:2 | <LOD     | <LOD     | <LOD     |
| PC ae C32:1 | 2.01E-06 | <LOD     | 7.32E-06 |
| PC ae C32:2 | <LOD     | <LOD     | <LOD     |
| PC ae C34:0 | 1.61E-05 | 5.31E-06 | 2.02E-05 |
| PC ae C34:1 | 9.58E-06 | 3.47E-06 | 2.69E-05 |
| PC ae C34:2 | 2.99E-06 | <LOD     | 3.29E-05 |
| PC ae C34:3 | 5.55E-06 | <LOD     | 2.11E-05 |
| PC ae C36:0 | <LOD     | <LOD     | <LOD     |
| PC ae C36:1 | <LOD     | <LOD     | 2.87E-05 |
| PC ae C36:2 | <LOD     | <LOD     | 4.71E-05 |
| PC ae C36:3 | 4.53E-06 | <LOD     | 2.07E-05 |
| PC ae C36:4 | <LOD     | <LOD     | 3.88E-05 |
| PC ae C36:5 | 2.36E-06 | <LOD     | 2.35E-05 |
| PC ae C38:0 | <LOD     | <LOD     | <LOD     |
| PC ae C38:1 | <LOD     | <LOD     | <LOD     |
| PC ae C38:2 | 1.07E-05 | 2.26E-06 | 6.01E-06 |
| PC ae C38:3 | 4.20E-06 | <LOD     | 1.24E-05 |
| PC ae C38:4 | <LOD     | <LOD     | 3.07E-05 |
| PC ae C38:5 | <LOD     | <LOD     | 3.26E-05 |
| PC ae C38:6 | 1.78E-06 | <LOD     | 1.91E-05 |
| PC ae C40:1 | 2.59E-06 | <LOD     | 6.45E-06 |
| PC ae C40:2 | 3.67E-06 | 1.22E-06 | 1.01E-05 |
| PC ae C40:3 | <LOD     | <LOD     | 3.81E-06 |
| PC ae C40:4 | <LOD     | <LOD     | 7.09E-06 |
| PC ae C40:5 | <LOD     | <LOD     | 7.89E-06 |
| PC ae C40:6 | 1.15E-05 | 2.40E-06 | 3.39E-05 |
| PC ae C42:0 | <LOD     | <LOD     | <LOD     |
| PC ae C42:1 | <LOD     | <LOD     | <LOD     |
| PC ae C42:2 | 2.63E-06 | <LOD     | 1.06E-05 |
| PC ae C42:3 | 1.29E-06 | <LOD     | 4.19E-06 |
| PC ae C42:4 | <LOD     | <LOD     | <LOD     |
| PC ae C42:5 | <LOD     | <LOD     | <LOD     |
| PC ae C44:3 | <LOD     | <LOD     | 6.25E-06 |
| PC ae C44:4 | <LOD     | <LOD     | <LOD     |
| PC ae C44:5 | <LOD     | <LOD     | <LOD     |
| PC ae C44:6 | <LOD     | <LOD     | 6.71E-06 |

|                            |               |          |          |          |
|----------------------------|---------------|----------|----------|----------|
| sphingolipids <sup>b</sup> | SM (OH) C14:1 | <LOD     | <LOD     | 1.21E-05 |
|                            | SM (OH) C16:1 | 1.94E-05 | 8.93E-06 | 2.24E-05 |
|                            | SM (OH) C22:1 | <LOD     | <LOD     | 2.77E-05 |
|                            | SM (OH) C22:2 | <LOD     | <LOD     | 3.03E-05 |
|                            | SM (OH) C24:1 | <LOD     | <LOD     | 5.49E-06 |
|                            | SM C16:0      | 3.13E-04 | 1.63E-04 | 4.65E-04 |
|                            | SM C16:1      | 7.03E-06 | 3.46E-06 | 3.17E-05 |
|                            | SM C18:0      | 1.05E-03 | 4.44E-04 | 9.22E-04 |
|                            | SM C18:1      | 4.52E-05 | 2.43E-05 | 5.93E-05 |
|                            | SM C20:2      | <LOD     | <LOD     | 8.19E-07 |
|                            | SM C22:3      | 8.02E-07 | <LOD     | 4.39E-06 |
|                            | SM C24:0      | 2.63E-06 | <LOD     | 4.01E-05 |
|                            | SM C24:1      | <LOD     | <LOD     | 1.17E-04 |
|                            | SM C26:0      | <LOD     | <LOD     | 1.51E-06 |
|                            | SM C26:1      | <LOD     | <LOD     | 1.53E-06 |

<sup>a</sup> PC aa/ae C x:y – phosphatidylcholine; where ‘aa’ denotes diacyl phosphatidylcholine, in turn ‘ae’ acyl-alkyl phosphatidylcholine, both with sum of carbon atoms and double bonds present in both lipid fatty acid chains indicated as *x* and *y*, respectively

<sup>b</sup> SM (OH) C x:y – sphingomyelin (with hydroxyl group denotes ‘OH’) with the sum of carbon atoms of both chains indicated as *x* and the total number of double bonds described as *y*

**Supplementary Table S3.** A list of MRM transitions for 42 amino acids and their corresponding internal standards along with collision energy values. Collision cell potential (CXP) of 50 V was applied for each transition.

| AMINO ACID            | ABBREV. | MRM TRANSITION (Q1 > Q3) |       |              |       | COLLISION ENERGY (EV) |
|-----------------------|---------|--------------------------|-------|--------------|-------|-----------------------|
|                       |         | ANALYTE                  |       | INTERNAL STD |       |                       |
|                       |         | Q1                       | Q3    | Q1           | Q3    |                       |
| 1-methylhistidine     | 1MHis   | 318.2                    | 121.1 | 310.2        | 113.1 | 30                    |
| 3-methylhistidine     | 3MHis   | 318.2                    | 121.1 | 310.2        | 113.1 | 30                    |
| alanine               | Ala     | 238.2                    | 121.1 | 230.2        | 113.1 | 30                    |
| anserine              | Ans     | 389.2                    | 121.1 | 381.2        | 113.1 | 30                    |
| arginine              | Arg     | 323.2                    | 121.1 | 315.2        | 113.1 | 30                    |
| argininosuccinic acid | Asa     | 439.2                    | 121.1 | 431.2        | 113.1 | 50                    |
| asparagine            | Asn     | 281.2                    | 121.1 | 273.2        | 113.1 | 30                    |
| aspartic acid         | Asp     | 282.1                    | 121.1 | 274.1        | 113.1 | 30                    |
| carnosine             | Car     | 375.2                    | 121.1 | 367.2        | 113.1 | 30                    |
| citrulline            | Cit     | 324.2                    | 121.1 | 316.2        | 113.1 | 30                    |
| cystathionine         | Cth     | 519.3                    | 121.1 | 503.3        | 113.1 | 50                    |
| cystine               | Cys     | 537.2                    | 121.1 | 521.2        | 113.1 | 50                    |
| ethanolamine          | EtN     | 210.2                    | 121.1 | 202.2        | 113.1 | 30                    |
| glutamic acid         | Glu     | 296.2                    | 121.1 | 288.2        | 113.1 | 30                    |
| glutamine             | Gln     | 295.2                    | 121.1 | 287.2        | 113.1 | 30                    |
| glycine               | Gly     | 224.1                    | 121.1 | 216.1        | 113.1 | 30                    |
| histidine             | His     | 304.2                    | 121.1 | 296.2        | 113.1 | 30                    |
| homocitrulline        | Hcit    | 338.2                    | 121.1 | 330.2        | 113.1 | 30                    |
| homocystine           | Hcy     | 565.3                    | 121.1 | 549.3        | 113.1 | 50                    |
| hydroxyproline        | Hyp     | 280.1                    | 121.1 | 272.1        | 113.1 | 30                    |
| isoleucine            | Ile     | 280.2                    | 121.1 | 272.2        | 113.1 | 30                    |
| leucine               | Leu     | 280.2                    | 121.1 | 272.2        | 113.1 | 30                    |
| lysine                | Lys     | 443.3                    | 121.1 | 427.3        | 113.1 | 50                    |
| methionine            | Met     | 298.2                    | 121.1 | 290.2        | 113.1 | 30                    |
| ornithine             | Orn     | 429.3                    | 121.1 | 413.3        | 113.1 | 50                    |
| phenylalanine         | Phe     | 314.2                    | 121.1 | 306.2        | 113.1 | 30                    |
| phosphoethanolamine   | PEtN    | 290.1                    | 121.1 | 282.1        | 113.1 | 30                    |
| phosphoserine         | PSer    | 334.1                    | 121.1 | 326.1        | 113.1 | 30                    |
| proline               | Pro     | 264.2                    | 121.1 | 256.2        | 113.1 | 30                    |
| sarcosine             | Sar     | 238.2                    | 121.1 | 230.2        | 113.1 | 30                    |
| serine                | Ser     | 254.2                    | 121.1 | 246.2        | 113.1 | 30                    |

|                                |      |       |       |       |       |    |
|--------------------------------|------|-------|-------|-------|-------|----|
| taurine                        | Tau  | 274.1 | 121.1 | 266.1 | 113.1 | 30 |
| threonine                      | Thr  | 268.2 | 121.1 | 260.2 | 113.1 | 30 |
| tryptophan                     | Trp  | 353.2 | 121.1 | 345.2 | 113.1 | 30 |
| tyrosine                       | Tyr  | 330.2 | 121.1 | 322.2 | 113.1 | 30 |
| valine                         | Val  | 266.2 | 121.1 | 258.2 | 113.1 | 30 |
| $\alpha$ -aminoadipic acid     | Aad  | 310.2 | 121.1 | 302.2 | 113.1 | 30 |
| $\alpha$ -amino-n-butyric acid | Abu  | 252.2 | 121.1 | 244.2 | 113.1 | 30 |
| $\beta$ -alanine               | bAla | 238.2 | 121.1 | 230.2 | 113.1 | 30 |
| $\beta$ -aminoisobutyric acid  | bAib | 252.2 | 121.1 | 244.2 | 113.1 | 30 |
| $\gamma$ -amino-n-butyric acid | GABA | 252.2 | 121.1 | 244.2 | 113.1 | 30 |
| $\delta$ -hydroxylysine        | Hyl  | 459.3 | 121.1 | 443.3 | 113.1 | 50 |

**Supplementary Table S4.** The percentage content of the amino acids quantified in the studied honeybee venom samples collected in different years (percentage of the dry weight of the venom). Venom samples were stored at -80°C until analysis in 2019.

| PROTEINOGENIC AMINO ACIDS<br>(% dry weight of honeybee venom)     |                           |        |        |        |
|-------------------------------------------------------------------|---------------------------|--------|--------|--------|
| Name                                                              | Year of sample collection |        |        |        |
|                                                                   | 2019                      | 2018   | 2017   | 2015   |
| alanine                                                           | 0.0201                    | 0.0300 | 0.0236 | 0.0721 |
| arginine                                                          | 0.0173                    | 0.0210 | 0.0239 | 0.0395 |
| asparagine                                                        | 0.0071                    | 0.0063 | 0.0036 | 0.0196 |
| aspartatic acid                                                   | 0.0043                    | 0.0061 | 0.0071 | 0.0232 |
| glutamic acid                                                     | 0.0264                    | 0.0273 | 0.0210 | 0.1163 |
| glutamine                                                         | 0.0219                    | 0.0161 | 0.0171 | 0.0443 |
| glycine                                                           | 0.0090                    | 0.0124 | 0.0102 | 0.0182 |
| histidine                                                         | 0.0042                    | 0.0033 | 0.0046 | 0.0261 |
| isoleucine                                                        | 0.0040                    | 0.0071 | 0.0058 | 0.0131 |
| leucine                                                           | 0.0047                    | 0.0078 | 0.0061 | 0.0184 |
| lysine                                                            | 0.0090                    | 0.0159 | 0.0126 | 0.0241 |
| methionine                                                        | 0.0049                    | 0.0057 | 0.0041 | 0.0053 |
| phenylalanine                                                     | 0.0038                    | 0.0054 | 0.0042 | 0.0130 |
| proline                                                           | 0.0526                    | 0.1050 | 0.0994 | 0.3152 |
| serine                                                            | 0.0063                    | 0.0084 | 0.0051 | 0.0231 |
| threonine                                                         | 0.0045                    | 0.0062 | 0.0048 | 0.0129 |
| tryptophan                                                        | 0.0024                    | 0.0025 | 0.0016 | 0.0045 |
| tyrosine                                                          | 0.0027                    | 0.0051 | 0.0047 | 0.0086 |
| valine                                                            | 0.0072                    | 0.0112 | 0.0066 | 0.0196 |
| total                                                             | 0.2123                    | 0.3028 | 0.2660 | 0.8171 |
| NON-PROTEINOGENIC AMINO ACIDS<br>(% dry weight of honeybee venom) |                           |        |        |        |
| Name                                                              | Year of sample collection |        |        |        |
|                                                                   | 2019                      | 2018   | 2017   | 2015   |
| $\alpha$ -aminoadipic acid                                        | 0.0004                    | 0.0002 | 0.0002 | 0.0009 |
| $\alpha$ -amino-n-butyric                                         | 0.0007                    | 0.0025 | 0.0045 | 0.0046 |

|                                       |        |        |        |        |
|---------------------------------------|--------|--------|--------|--------|
| $\beta$ -aminoisobutyric              | 0.0018 | 0.0018 | 0.0023 | 0.0012 |
| $\beta$ -alanine                      | 0.0247 | 0.0287 | 0.0270 | 0.0493 |
| cystine                               | 0.0232 | 0.0128 | 0.0212 | 0.0075 |
| ethanolamine                          | 0.0152 | 0.0130 | 0.0116 | 0.0098 |
| $\gamma$ -amino-n-butyric acid (GABA) | 0.0040 | 0.0044 | 0.0033 | 0.0096 |
| hydroxyproline                        | 0.0008 | 0.0011 | 0.0023 | 0.0059 |
| ornithine                             | 0.0012 | 0.0015 | 0.0014 | 0.0017 |
| phosphoethanolamine                   | 0.0052 | 0.0124 | 0.0083 | 0.0094 |
| sarcosine                             | 0.0009 | 0.0018 | 0.0017 | 0.0057 |
| taurine                               | 0.0392 | 0.0289 | 0.0231 | 0.0473 |
| total                                 | 0.1173 | 0.1091 | 0.1069 | 0.1529 |

**Supplementary Table S5.** LC parameters for untargeted metabolomics.

| PARAMETER                | SETTING                                                                               |     |
|--------------------------|---------------------------------------------------------------------------------------|-----|
| Chromatographic column   | ACE Excel 2 C18-PFP, 2.1×100 mm, 2,0 μm<br>(Advanced Chromatography Technologies Ltd) |     |
| Mobile phase             | Eluent A: 0.1% formic acid in water<br>Eluent B: acetonitrile                         |     |
| Flow rate                | 0.35 mL/min                                                                           |     |
| Temperature              | 25 °C                                                                                 |     |
| Gradient elution profile | Total time, min                                                                       | % A |
|                          | 0                                                                                     | 100 |
|                          | 3                                                                                     | 100 |
|                          | 13                                                                                    | 20  |
|                          | 16                                                                                    | 20  |
|                          | 16.5                                                                                  | 100 |
|                          | 20.5                                                                                  | 100 |
| Injection volume         | 2 μL for positive ionization<br>4 μL for negative ionization                          |     |
| Run time                 | 20.5 min                                                                              |     |
| Detector                 | Q-Orbitrap mass spectrometer                                                          |     |

**Supplementary Table S6.** MS parameters for untargeted metabolomics.

| PARAMETER                             | SETTING                                   |
|---------------------------------------|-------------------------------------------|
| Ionization method                     | Electrospray                              |
| Ionization mode                       | Positive and negative                     |
| Scan mode                             | Data dependent MS/MS (top 5) with full MS |
| Mass range                            | 70-1,000 m/z                              |
| Probe temperature                     | 350 °C                                    |
| Spray voltage                         | 3,500 V/-3,500 V                          |
| Capillary temperature                 | 320 °C                                    |
| Sheath gas flow                       | 40 arb                                    |
| Auxiliary gas flow                    | 10 arb                                    |
| Sweep gas flow                        | 1 arb                                     |
| Mass resolution                       | 35,000 at <i>m/z</i> 200                  |
| Source collision-induced dissociation | 2 eV                                      |



**Supplementary Table S7.** LC parameters for wide-spectrum metabolite determination using AbsoluteIDQ p180 kit.

| <b>LC-MS/MS</b>                                                                     |                                                                                   |     |  |
|-------------------------------------------------------------------------------------|-----------------------------------------------------------------------------------|-----|--|
| (Determination of amino acids and biogenic amines)                                  |                                                                                   |     |  |
| PARAMETER                                                                           | SETTING                                                                           |     |  |
| Chromatographic column                                                              | Zorbax Eclipse XDB C18, 3.0×100 mm, 3.5 μm (Agilent Technologies)                 |     |  |
| Pre-column                                                                          | SecurityGuard C18 (3.0×4.0 mm, Phenomenex)                                        |     |  |
| Mobile phase                                                                        | Eluent A: 0.2% formic acid in water<br>Eluent B: 0.2% formic acid in acetonitrile |     |  |
| Flow rate                                                                           | 0.5 mL/min                                                                        |     |  |
| Temperature                                                                         | 50 °C                                                                             |     |  |
| Gradient elution profile                                                            | Total time, min                                                                   | % A |  |
|                                                                                     | 0                                                                                 | 100 |  |
|                                                                                     | 0.5                                                                               | 100 |  |
|                                                                                     | 5.5                                                                               | 5   |  |
|                                                                                     | 6.5                                                                               | 5   |  |
|                                                                                     | 7                                                                                 | 100 |  |
|                                                                                     | 9.5                                                                               | 100 |  |
| Injection volume                                                                    | 10 μL                                                                             |     |  |
| Run time                                                                            | 9.5 min                                                                           |     |  |
| Detector                                                                            | Triple quadrupole mass spectrometer                                               |     |  |
| <b>FIA-MS/MS</b>                                                                    |                                                                                   |     |  |
| (Determination of hexoses, acylcarnitines, sphingomyelins and glycerophospholipids) |                                                                                   |     |  |
| PARAMETER                                                                           | SETTING                                                                           |     |  |
| Chromatographic column                                                              | None. Flow injection analysis (FIA)                                               |     |  |
| Mobile phase                                                                        | Biocrates MS Running Solvent                                                      |     |  |
| Flow rate                                                                           | 0.03 – 0.2 mL/min                                                                 |     |  |
| Injection volume                                                                    | 20 μL                                                                             |     |  |
| Run time                                                                            | 3 min                                                                             |     |  |
| Detector                                                                            | Triple quadrupole mass spectrometer                                               |     |  |

**Supplementary Table S8.** MS parameters for wide-spectrum metabolite determination using AbsoluteIDQ p180 kit.

| PARAMETER          | SETTING                            |                                                                        |
|--------------------|------------------------------------|------------------------------------------------------------------------|
|                    | LC-MS/MS                           | FIA-MS/MS                                                              |
| Ionization method  | Electrospray                       |                                                                        |
| Ionization mode    | Positive                           | Positive and negative                                                  |
| Scan mode          | Multiple reaction monitoring (MRM) |                                                                        |
| Temperature        | 500 °C                             | 200 °C                                                                 |
| Ion spray voltage  | 5500 V                             | 5500 V for positive ionization *<br>-4500 V for negative ionization ** |
| Curtain gas        | 20 psig                            |                                                                        |
| Ion source gas 1   | 40 psig                            |                                                                        |
| Ion source gas 2   | 50 psig                            |                                                                        |
| Entrance potential | 10 V                               | 10 V / -10 V                                                           |
| Collision gas      | Nitrogen                           |                                                                        |

\*positive ionization mode was used for determination of amino acids, amines, acylcarnitines, glycerophospholipids, and sphingolipids

\*\*negative ionization was used for determination of hexoses

**Supplementary Table S9.** LC parameters for wide-spectrum amino acid determination using aTRAQ kit.

| PARAMETER                | SETTING                                                                                                                                           |     |
|--------------------------|---------------------------------------------------------------------------------------------------------------------------------------------------|-----|
| Chromatographic column   | AAA C18, 4.6×150 mm (Sciex)                                                                                                                       |     |
| Mobile phase             | Eluent A: 0.1% formic acid and 0.01% heptafluorobutyric acid in water<br>Eluent B: 0.1% formic acid and 0.01% heptafluorobutyric acid in methanol |     |
| Flow rate                | 0.8 mL/min                                                                                                                                        |     |
| Temperature              | 50 °C                                                                                                                                             |     |
| Gradient elution profile | Total time, min                                                                                                                                   | % A |
|                          | 0                                                                                                                                                 | 98  |
|                          | 6                                                                                                                                                 | 60  |
|                          | 10                                                                                                                                                | 60  |
|                          | 11                                                                                                                                                | 10  |
|                          | 12                                                                                                                                                | 10  |
|                          | 13                                                                                                                                                | 98  |
| 18                       | 98                                                                                                                                                |     |
| Injection volume         | 2 µL                                                                                                                                              |     |
| Run time                 | 18 min                                                                                                                                            |     |
| Detector                 | Triple quadrupole mass spectrometer                                                                                                               |     |

**Supplementary Table S10.** MS parameters for wide-spectrum amino acid determination using aTRAQ kit.

| PARAMETER              | SETTING                            |
|------------------------|------------------------------------|
| Ionization method      | Electrospray                       |
| Ionization mode        | Positive                           |
| Scan mode              | Multiple reaction monitoring (MRM) |
| Temperature            | 600 °C                             |
| Ion spray voltage      | 4500 V                             |
| Curtain gas            | 20 psig                            |
| Ion source gas 1       | 60 psig                            |
| Ion source gas 2       | 50 psig                            |
| Declustering potential | 30 V                               |
| Entrance potential     | 10 V                               |
| Collison gas           | Nitrogen                           |

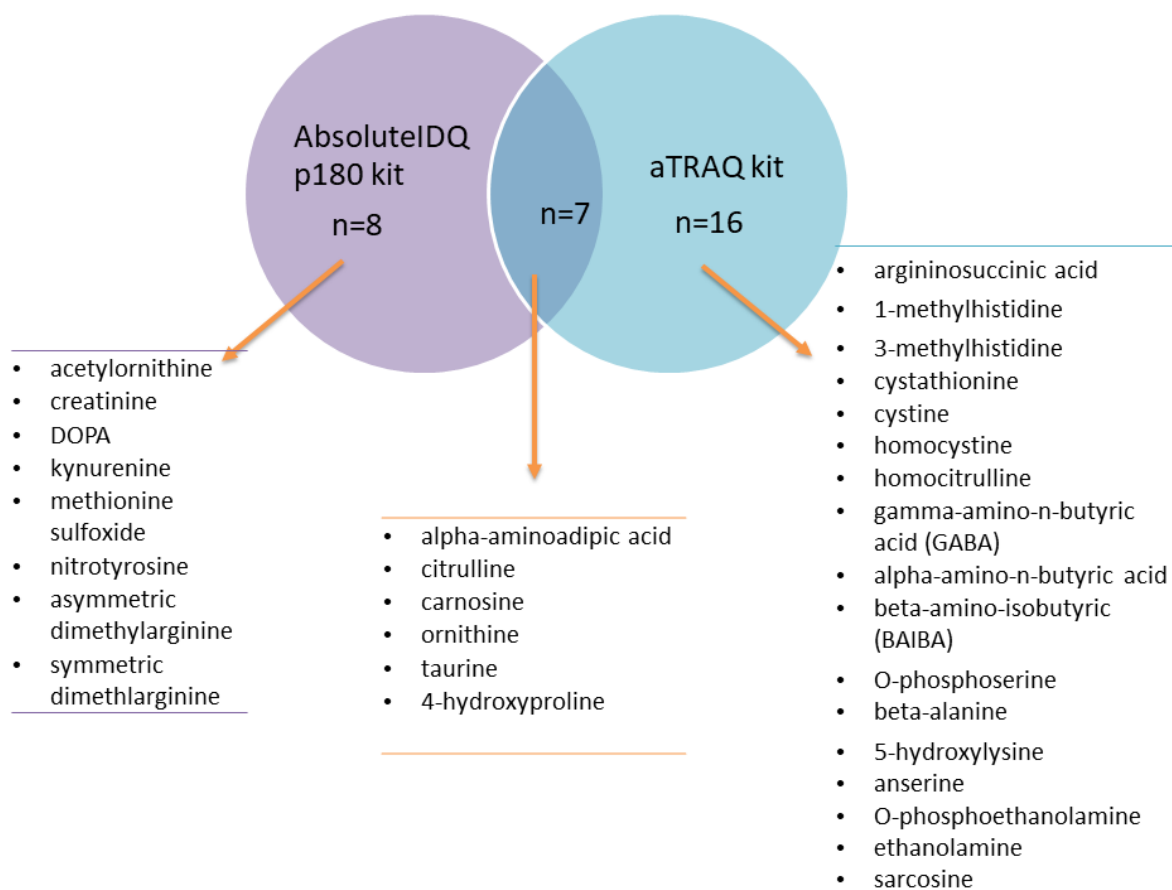

**Supplementary Figure S1.** Venn diagram presenting common and unique analytes covered by the two applied targeted metabolomics methodologies (AbsoluteIDQ p180 kit and aTRAQ kit) among non-proteinogenic amino acids and amino acid derivatives. Both kits enable an analysis of the same set of proteinogenic amino acids.

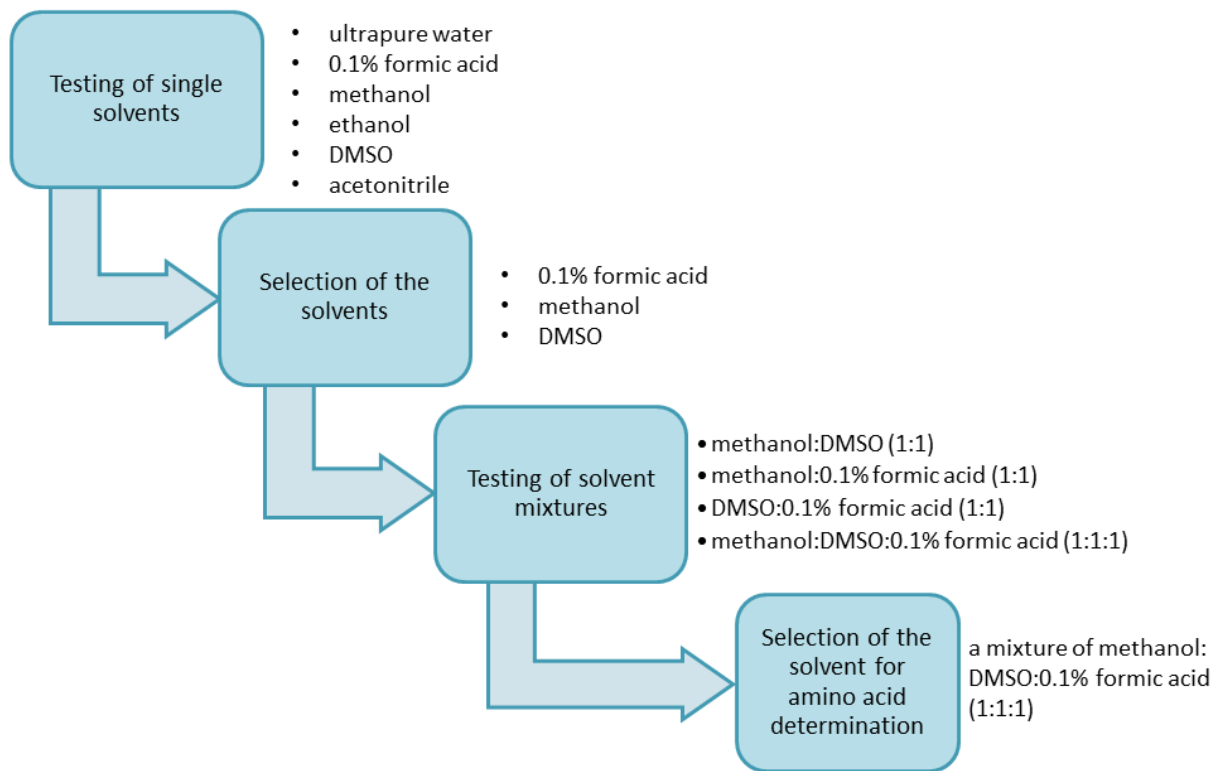

**Supplementary Figure S2.** A workflow applied to select the most appropriate solvent for the determination of free amino acids in honeybee venom samples. Two criteria for choosing a solvent were set up: number of analytes quantified in a sample (with concentrations above the lower limit of quantitation) and a total amino acid concentration.

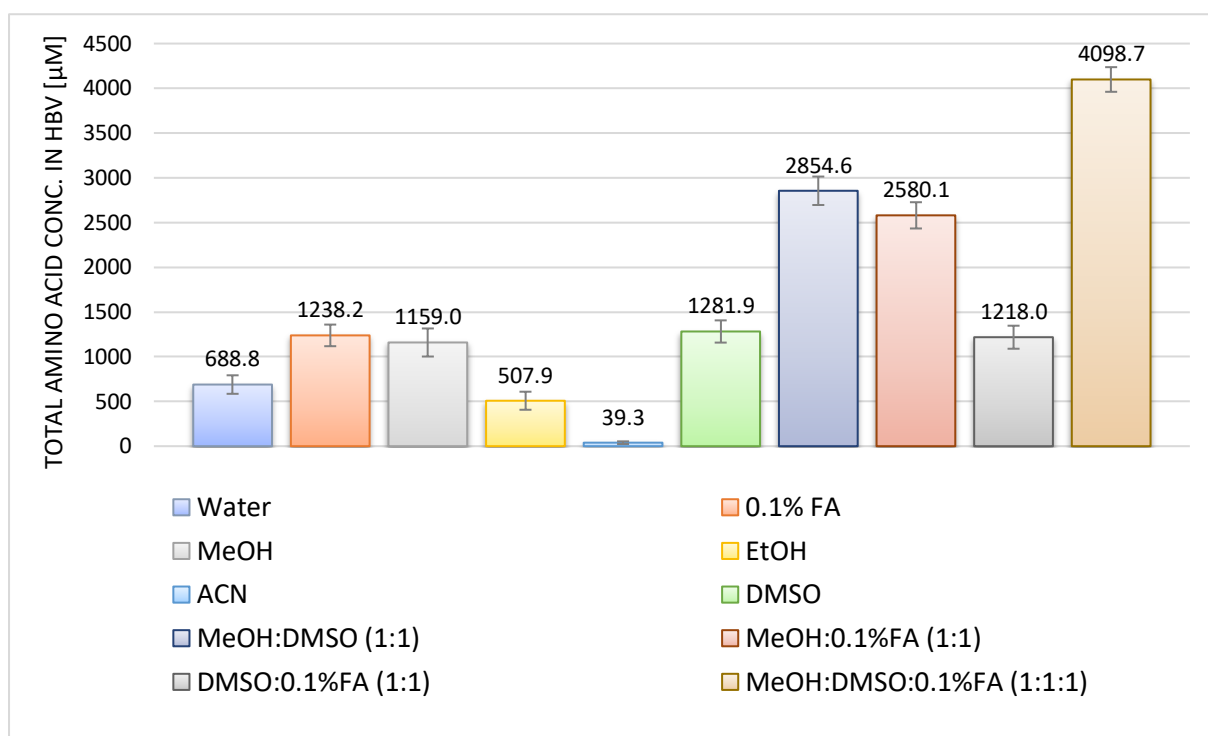

**Supplementary Figure S3.** Bar chart showing the impact of solvent on the total amino acid concentration (average  $\pm$  SD) quantified in honeybee venom sample. Among single solvents, the highest total amino acid concentration was observed using DMSO, 0.1% formic acid in water, and methanol. Therefore, the mixtures of these three solvents were tested in the next step of method optimization. MeOH – methanol, ACN – acetonitrile, EtOH – ethanol, DMSO – dimethyl sulfoxide, 0.1%FA – 0.1% formic acid in water. In brackets volume ratios were given.

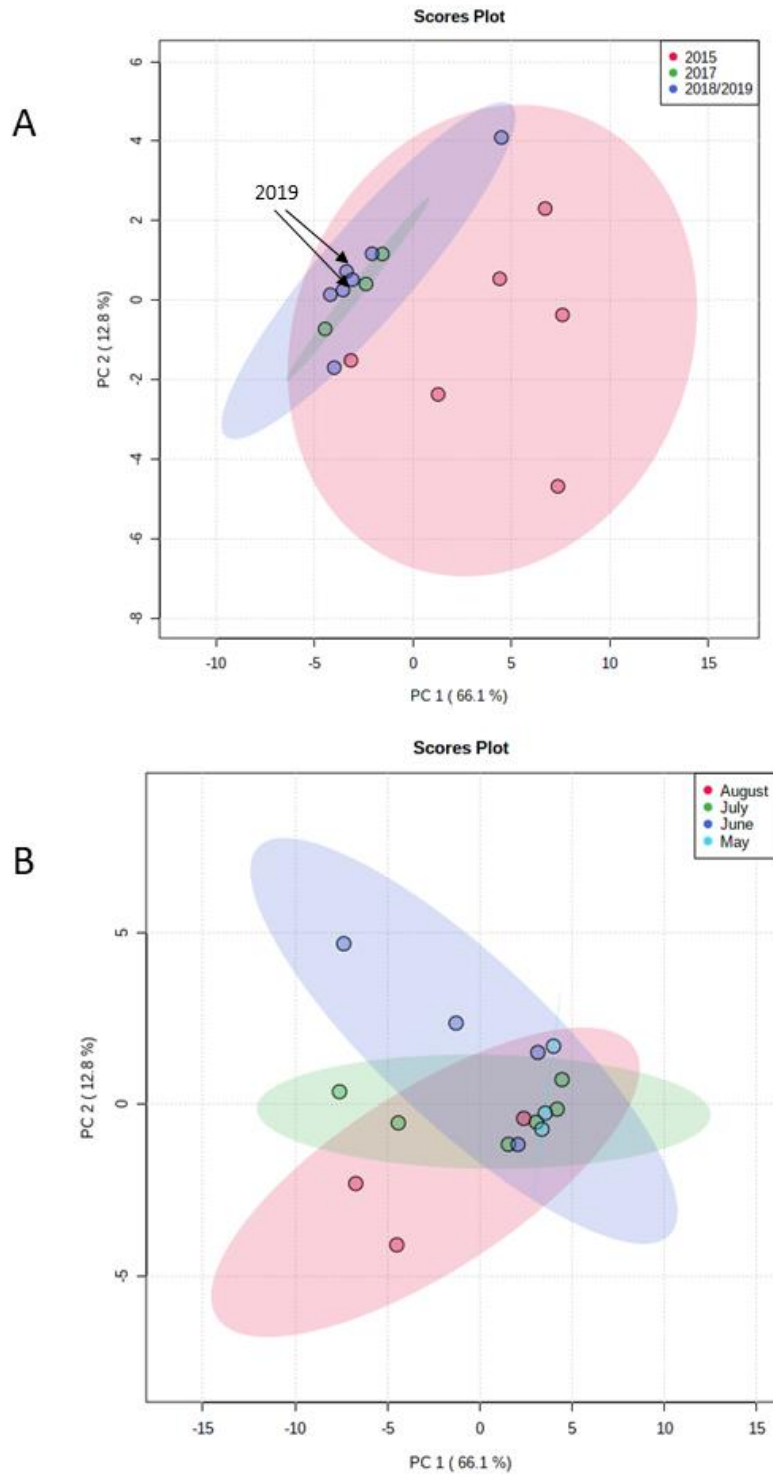

**Supplementary Figure S4.** Scores plots between the first and second principal components (with explained variances shown in brackets) obtained in principal component analysis (PCA) of amino acid profiles in honeybee venom. A – year of sample collection was taken as a grouping variable. At least three replicates are required in each group, therefore samples collected in 2018 (n=5) and 2019 (n=2) were combined in one group. B- month of sample collection was taken as a grouping variable. Before the PCA data were autoscaled.

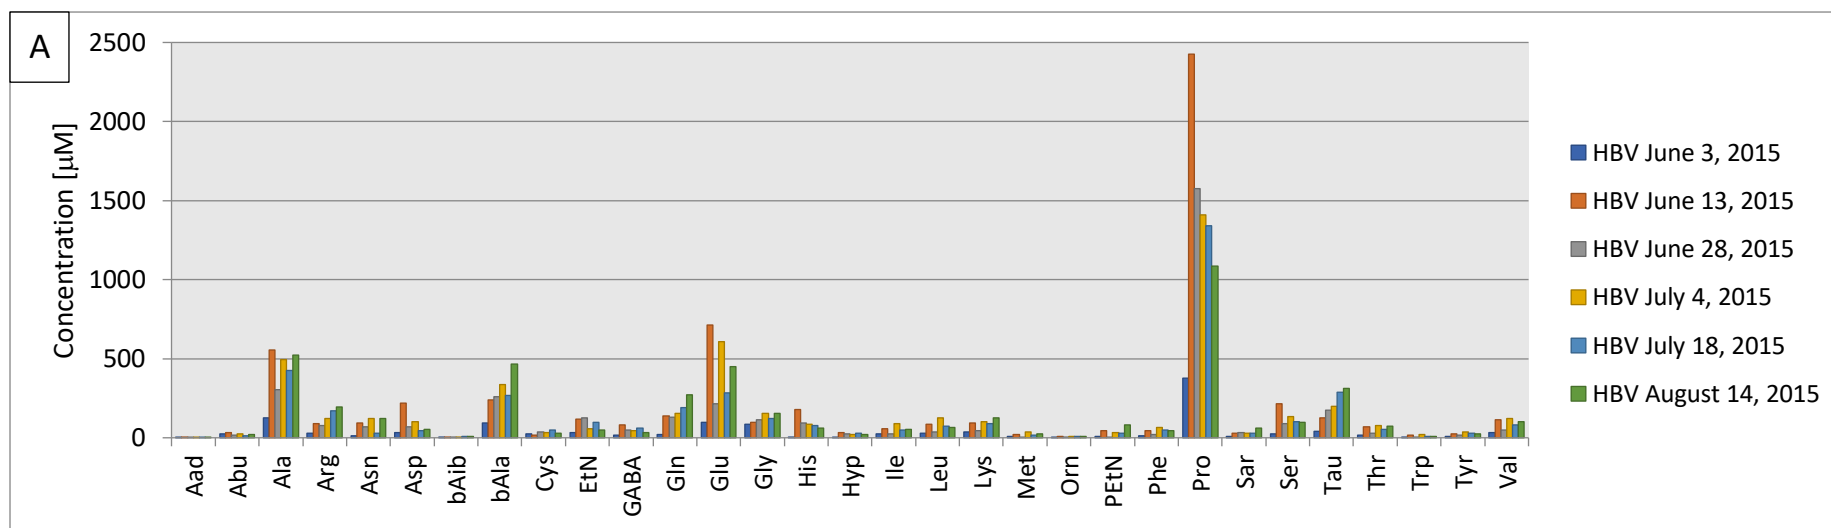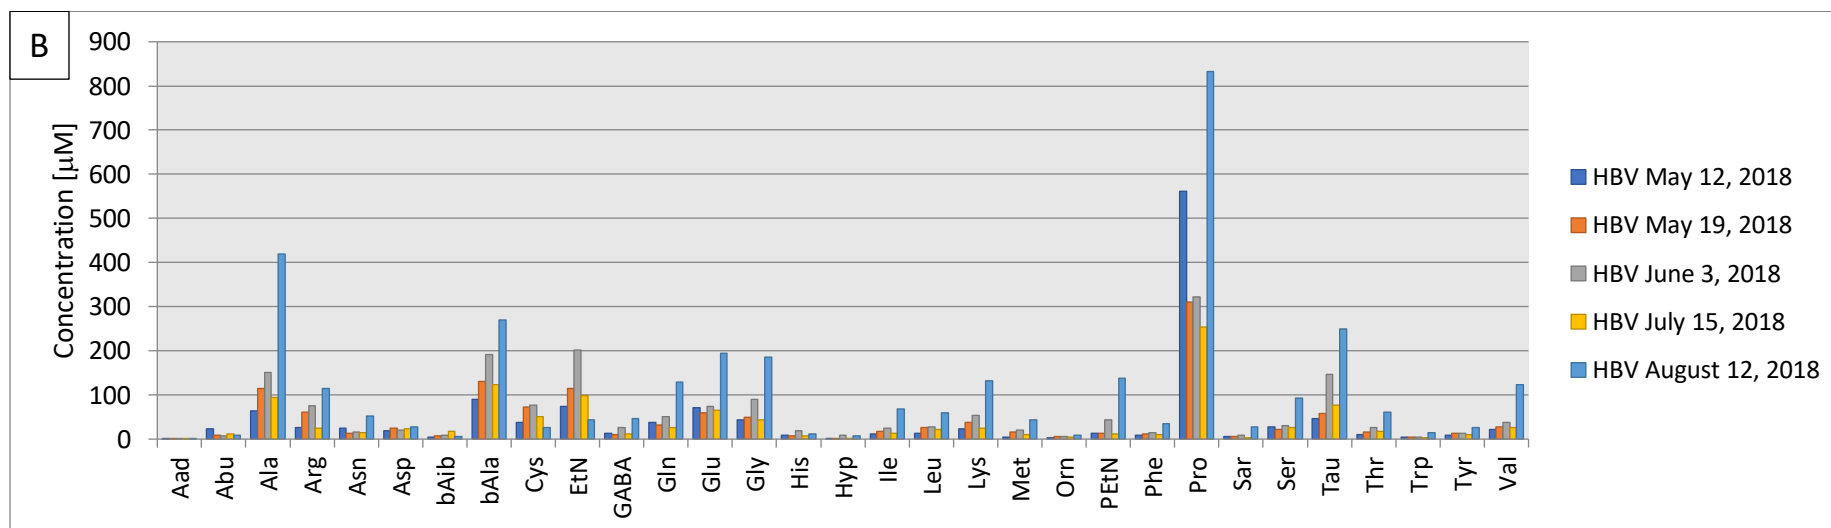

**Supplementary Figure S5.** Amino acid profiles determined in solutions of honeybee venom ( $c=50$  mg/ml) collected in different months and years (A – 2015, B- 2018). Amino acid abbreviations are defined in Table S3.
